# Supplementary material for: Ecological roles of secondary metabolites of Saposhnikovia divaricata in adaptation to drought stress
Source: PeerJ. 2022 Nov 4;10:e14336. doi: 10.7717/peerj.14336 (PMC9639429; doi:10.7717/peerj.14336)
Supplement: Supplemental Information 2 [file peerj-10-14336-s002.xlsx]

## Sheet: Sheet1
Classification of 146 metabolites based on Saposhnikovia divaricata
Classification	Metabolites	Molecular weight	Retention time
Chromones (20)	3'-O-propionylhamaudol	C17H17O7	0.9
	Undulatoside A	C16H18O9	3.5
	Divaricatacid	C16H16O7	4.7
	3,8-Dihydroxy-11,11-dimethyl-13-(3-methyl-2-buten-1-yl)-6-(2-methyl-1-propen-1-yl)-6H,7H,11H-chromeno[4,3-b]pyrano[3,2-g]chromen-7-one	C30H30O6	5.3
	Cimifugin 7-glucoside	C22H28O11	5.32
	11-hydroxy-sec-o-β-D-glucosylhammaudol	C21H26O11	5.9
	(2S)-5-Hydroxy-2-[(1R)-3-hydroxy-4-methoxy-2-cyclohexen-1-yl]-4-oxo-3,4-dihydro-2H-chromen-7-yl 6-O-(6-deoxy-alpha-L-mannopyranosyl)-beta-D-glucopyranoside	C28H38O15	6.25
	Cimifugin	C16H18O6	6.43
	3-(7,8-Dimethoxy-4-methyl-2-oxo-2H-chromen-3-yl)propanoic acid	C15H16O6	6.6
	5-O-Methylvisammiosidel	C22H28O10	6.8
	Methyl (2S,3E,4S)-4-{2-[2-(3,4-dihydroxyphenyl)-2-ethoxyethoxy]-2-oxoethyl}-3-ethylidene-2-(α-L-idopyranosyloxy)-3,4-dihydro-2H-pyran-5-carboxylate	C27H36O14	6.83
	5-O-methylvisaminol	C16H18O5	7.3
	Sec-O-Glucosylhamaudol	C21H26O10	7.5
	3-(2,3-Dihydro-1,4-benzodioxin-6-yl)-4-oxo-7-{[3,4,5-trihydroxy-6-(hydroxymethyl)-2,3,4,5,6-pentamethyltetrahydro-2H-pyran-2-yl]oxy}-4H-chromene-2-carboxylic acid	C29H32O12	8.1
	Hamaudol	C15H16O5	8.56
	Divaricatol	C17H18O7	9.8
	6-methylvisaminol	C16H18O6	11.11
	Ledebomiellol	C20H20O7	12.7
	3-O-Acetylhamaudol	C17H18O6	13.14
	3'-O-i-butyrylhamaudol	C19H22O6	14.4
Coumarins (30)	5-5-methoxy-7-(3,3-dimethylallyloxy)coumarin	C14H16O4	0.9
	Oxypeucedanin hydrate	C16H16O6	0.9
	9-Hydroxy-7-oxo-7H-furo[3,2-g]chromen-4-yl 6-O-beta-D-glucopyranosyl-beta-D-glucopyranoside	C23H26O15	0.9
	Nodakenin	C20H24O9	1.4
	7-Hydroxycoumarin	C9H6O3	3.6
	Methyl 5-methyl-4-{[(2-oxo-2H-chromen-7-yl)oxy]methyl}-2-furoate	C17H14O6	4.4
	6-Oxo-6,7,8,9,10,11-hexahydrocyclohepta[c]chromen-3-yl 2,3,4,6-tetra-O-acetyl-β-D-glucopyranoside	C28H32O12	4.8
	Scopoletin	C10H8O4	5.4
	Crisilineol	C18H16O7	5.6
	(-)-Cis-khellactone	C14H14O5	6.1
	Marmesin	C14H14O4	6.39
	Deltoin	C19H20O5	6.4
	6-Oxo-7,8,9,10-tetrahydro-6H-benzo[c]chromen-3-yl 2,3,4-tri-O-acetyl-尾-D-xylopyranoside	C24H26O10	6.78
	Cleomiscosin A	C20H18O8	7.9
	Psoralen	C11H6O3	8.5
	Isopimpinellin	C13H10O5	9.6
	Bergapten	C12H8O4	9.7
	2-(4-METHYL-6-OXO-6H-BENZO(C)CHROMEN-3-YLOXY)-PROPIONIC ACID	C17H14O5	10.15
	Ostenol	C14H14O3	10.2
	Isofraxidin	C11H10O5	10.4
	3,4-dimethyl-7-(1-methyl-2-oxopropoxy)-2H-chromen-2-one	C15H16O4	12.1
	Ethyl 3-[7-(3,3-dimethyl-2-oxobutoxy)-4,8-dimethyl-2-oxo-2H-chromen-3-yl]propanoate	C22H28O6	12.51
	4-Butyl-7-[(3,4,5-trimethoxybenzyl)oxy]-2H-chromen-2-one	C23H26O6	12.74
	5-Hydroxy-8-methoxypsoralen	C12H8O5	12.9
	Isoimperatorin	C16H14O4	13
	Phellopterin	C17H16O5	13.36
	{4-Methyl-5,7-bis[(2-methyl-2-propen-1-yl)oxy]-2-oxo-2H-chromen-3-yl}acetic acid	C20H22O6	15.2
	3-(4-Methyl-2-oxo-6,7,8,9-tetrahydro-2H-[1]benzofuro[3,2-g]chromen-3-yl)propanoic acid	C19H18O5	15.7
	3-(3-Ethoxy-3-oxopropyl)-4,8-dimethyl-2-oxo-2H-chromen-7-yl cyclohexanecarboxylate	C23H28O6	16.4
	Scopolin	C16H18O9	20.59
Aliphatic Acid&Organic acids(16)	Shikimic acid	C7H10O5	0.8
	3-(3,5-Dimethoxyphenyl)-1,2,2-propanetricarboxylic acid	C14H16O8	2.87
	Tetramethyl (2R,3R,5R,6R)-7-oxabicyclo[2.2.1]heptane-2,3,5,6-tetracarboxylate	C14H18O9	2.9
	Ferulic Acid	C10H10O4	5.8
	Citric Acid	C₆H₈O₇	6.1
	(2E)-[(2S,4S)-2-(β-D-Glucopyranosyloxy)-4-{2-[2-(4-hydroxyphenyl)ethoxy]-2-oxoethyl}-5-(methoxycarbonyl)-2H-pyran-3(4H)-ylidene]acetic acid	C25H30O14	6.24
	LinoelaidicAcid	C18H32O2	16.6
	17,20-dimethyl Prostaglandin	C22H40O5	16.8
	12-Hydroxyoctadecanoic acid	C20H42O5	17.35
	3-Phosphoglycerate	C9H14N	17.59
	Phosphoenolpyruvic acid	C9H18O6PN	17.59
	Alpha-calendic acid	C18H30O2	18.1
	Palmitic acid	C16H32O2	18.2
	2-Undecenoic acid	C11H20O2	19.2
	Oleic acid	C18H34O2	19.9
	Methyl linoleate	C19H34O2	21.2
Benzene rings (13)	2-({3-[(2-Methoxyethoxy)carbonyl]-2-methyl-1-benzofuran-5-yl}o	C16H18O7	4.64
	Methyl 2-ethyl-6-methoxybenzoate	C11H14O3	4.79
	6-Hydroxy-anisaldehyde	C8H8O3	5.1
	Ethyl (1R)-1-(2-hydroxy-1,3-dioxo-2,3-dihydro-1H-inden-2-yl)-2-oxocyclopentanecarboxylate	C17H16O6	11.2
	Dibutyl phthalate	C16H22O4	11.8
	17-Hydroxy-3,11,20-trioxopregna-1,4-dien-21-yl propionate	C24H30O6	12.3
	Neocnidilide	C12H18O2	12.8
	(4E,8E,12E)-14-{2-Acetoxy-3,4-dimethyl-5-[(2,3,4-tri-O-acetyl-β-D-xylopyranosyl)oxy]phenyl}-4,8,12-trimethyl-4,8,12-tetradecatrien-1-yl acetate	C40H56O12	14.6
	4-[(4aR,6S)-2,3,4,4a,6,6a,7,8,9,10b-Decahydro-1H-benzo[c]chromen-6-yl]-1-butanol	C17H28O2	17.4
	Butylated Hydroxytoluene	C15H24O	17.62
	(3E,5E,7E,9E,11E,13E,15E,17E,19E)-5,9,14,18-Tetramethyl-20-(2,6,6-trimethyl-1-cyclohexen-1-yl)-3,5,7,9,11,13,15,17,19-henicosanonaen-2-one	C34H46O	17.62
	4-{Bis[3,6-bis(2-methyl-2-propanyl)-1-azulenyl]methyl}-2,6-bis(2-methyl-2-propanyl)phenol	C51H68O	17.62
	Curcumene	C15H22	17.8
Flavones (14)	3′,5′,5,7-tetramethoxy-4′-O-β-glucoside flavone	C24H26O12	4.8
	(2S)-5-Hydroxy-6,8-dimethyl-4-oxo-2-phenyl-3,4-dihydro-2H-chromen-7-yl 6-O-(4-carboxy-3-hydroxy-3-methylbutanoyl)-β-D-glucopyranoside	C29H34O13	4.94
	(2R)-5-Hydroxy-2-(4-hydroxyphenyl)-8-(3-methyl-2-buten-1-yl)-4-oxo-3,4-dihydro-2H-chromen-7-yl β-D-glucopyranoside	C26H30O10	6.1
	(2S,4aR,6R,7R,8S,8aR)-2-(3,4-Dihydroxyphenyl)-6-(hydroxymethyl)-8-{[(2S,3R,4R,5R,6S)-3,4,5-trihydroxy-6-methyltetrahydro-2H-pyran-2-yl]oxy}hexahydro-4aH-pyrano[2,3-b][1,4]dioxin-7-yl (2E)-3-(4-hydroxy -3-methoxyphenyl)acrylate	C30H36O15	6.2
	Methyl hesperidin	C29H36O15	7.1
	Tectochrysin	C16H12O4	7.2
	5,7-Dihydroxy-2-(4-hydroxyphenyl)-8-(3-methyl-2-buten-1-yl)-4-oxo-4H-chromen-3-yl 2-O-(6-deoxy-β-D-gulopyranosyl)-β-D-xylopyranoside	C31H36O14	7.9
	Naringin dihydrochalcone	C27H34O14	10.39
	Naringin	C15H12O5	11.73
	Quercetin	C15H14O9	13.4
	2-(3,4-Dihydroxyphenyl)-3-hexadecyl-5,6,7-trimethoxy-4H-chromen-4-one	C34H48O7	20.4
	Rutin	C27H30O16	20.5
	(3β)-Cholest-5-en-3-yl [(5-hydroxy-4-oxo-2-phenyl-4H-chromen-7-yl)oxy]acetate	C44H56O6	20.86
Phenylpropanoids(6)	Alpha-Asarone	C12H16O3	8.1
	Croweacin	C12H14O4	12.8
	Curcumol	C15H24O2	13.9
	Germacr-1(10)-ene-5,8-dione	C15H22O2	14.2
	2,6-Bis(1-phenylethyl)-4-nonylphenol	C31H40O	14.5
	Picroside III	C25H30O13	17.6
Aldehydes (8)	Cinnamaldehyde	C9H8O	1.8
	Octyl aldehyde	C8H16O	4.9
	Heptaldehyde	C7H14O	5.7
	Benzaldehyde	C7H6O	10.2
	2,4-decadienal	C10H16O	10.4
	(1S)-1-Hydroxy-1-[(2R,3R,4S,5S)-3,4,5-triacetyl-3,4,5,6,6-pentahydroxytetrahydro-2H-pyran-2-yl]acetone	C14H20O11	16.9
	(13R)-13-Hydroxy-14-[(5S)-5-methyl-2-oxo-2,5-dihydro-3-furanyl]tetradecyl 3-O-undecyl-β-D-galactopyranoside	C36H66O9	17.1
	2-Nonadecanone	C19H38O	18.9
Terpenoids&Polyacetylenes(5)	17-Hydroxy-3,20-dioxopregn-4-en-21-yl stearate	C39H64O5	14.49
	Panaxynol	C17H24O	14.8
	Ciguatoxin HIJKLM cyclic acetal	C32H50O12	14.8
	(2Z)-2-Benzylidenecholest-4-en-3-one	C34H48O	17.6
	(1R,6S,8S)-2,2,7,7-Tetramethyltricyclo[6.2.1.01,6]undecan-6-ol	C15H26O	18.4
Esters(14)	P-hydroxycinnamic acid	C20H26O6	1.54
	(1aS,1bS,2S,5aR,6S,6aS)-2-(β-D-Glucopyranosyloxy)-1a-(hydroxymethyl)octahydrooxireno[4,5]cyclopenta[1,2-c]pyran-6-yl 4-hydroxybenzoate	C22H28O12	4.2
	(2S)-1-[(9Z)-9-Hexadecenoyloxy]-3-hydroxy-2-propanyl (9Z,12Z,15Z)-9,12,15-octadecatrienoate	C37H64O5	7.5
	Bornyl acetate	C12H20O2	13.2
	Falcarinol	C17H24O	14.5
	3,7-Dimethyl-7-octen-1-yl benzoate	C17H24O2	15.2
	Methyl linoleate	C19H32O2	17.2
	Deoxyloganic acid tetraacetate	C24H32O13	17.6
	ETHYL LINOLEATE	C20H36O2	17.9
	glycerol monolinoleate	C21H38O4	18.02
	Methyl palmitate	C17H34O2	19.6
	Glyceryl monooleate	C21H40O4	19.6
	1-Hydroxy-3-(9,12,15-octadecatrienoyloxy)-2-propanyl 5,8,11,14-icosatetraenoate	C41H66O5	21.3
	9,12-Octadecadienoicacid (9Z,12Z)-, 1,1'-(2-hydroxy-1,3-propanediyl) ester	C39H68O5	21.4
Others(20)	Divaricataester A	C13H15O5N	0.9
	Adenosine	C10H13O4N5	1.3
	L-Tyrosine	C9H11NO3	1.52
	D-Mannitol	C6H14O	1.8
	Myristicin	C11H12O3	1.9
	PHENYLALANINE	C9H11NO2	2.67
	Divaricataester B	C18H20O7	3
	Tryptophan	C11H12N2O2	3.68
	Sucrose	C12H22O11	5.8
	3-Hydroxy-2-[3-(4-hydroxyphenyl)propanoyl]-5-methoxyphenyl 6-O-(6-deoxy-β-L-mannopyranosyl)-α-D-glucopyranoside	C28H36O14	7.46
	(1R,3R,5S,8S,9R,12S,13R,14R)-1-Hydroxy-14-isopropenyl-13-methyl-4,7,10-trioxapentacyclo[6.4.1.19,12.03,5.05,13]tetradecane-6,11-dione	C30H34O13	8.9
	2-Benzoyl-3,5-dihydroxyphenyl 2-O-[(2S,3R,4R)-3,4-dihydroxy-4-(hydroxymethyl)tetrahydro-2-furanyl]-β-D-glucopyranoside	C24H28O13	9.3
	7-Methyl-3-methyleneocta-1,6-diene	C10H16	13.1
	Bornyl acetate	C12H20O2	13.2
	(1α,3β,22R,24Z)-1,3,22-Trihydroxyergosta-5,24-dien-26-yl β-D-glucopyranoside	C34H56O9	18.22
	alpha-TERPINEOL	C8H8O	18.8
	2,4,6-Tri-tert-butylphenol	C18H30O	19.2
	Cholest-5-en-3-ol (3b)-, 3-(hydrogen1,2-benzenedicarboxylate)	C35H50O4	19.7
	(24R)-METHYLCHOLESTA-3,5-DIENE AND (24R)-ETHYLCHOLESTA-3,5-DIENE	C29H48	20.7
	(16E)-16-(4-Isopropylbenzylidene)androstane-3,17-diol	C29H42O2	20.79
